# Supplementary material for: The mitochondrial genome of Apion squamigerum (Coleoptera, Curculionoidea, Brentidae) and the phylogenetic implications
Source: PeerJ. 2020 Jan 13;8:e8386. doi: 10.7717/peerj.8386 (PMC6964704; doi:10.7717/peerj.8386)
Supplement: Table S1 [file peerj-08-8386-s001.xlsx]

## Sheet: Taxa in this study
Table S1. Taxa included in this study.
Superfamily	Family	Subfamily	Tribe	Species	Accession number
Curculionoidea	Anthribidae	-	-	Anthribidae sp. 6 ACP2013 voucher BMNH1040667	MH789715
Curculionoidea	Anthribidae	-	-	Anthribidae sp. 9 ACP2013 voucher BMNH1040810	MH789733
Curculionoidea	Anthribidae	Anthribinae	Ecelonerini	Chirotenon longimanus	JX412830
Curculionoidea	Anthribidae	Anthribinae	Platystomini	Platystomos albinus	KX087337
Curculionoidea	Anthribidae	Urodontinae	Urodontus	Urodontus glabratus	JX412859
Curculionoidea	Anthribidae	Urodontinae	Urodontus	Urodontus sp. URO01	JX412764
Curculionoidea	Attelabidae	Apoderinae	-	Apoderinae sp. 2 AV2018	MH473531
Curculionoidea	Attelabidae	Apoderinae	Apoderus	Apoderus coryli	JN163966
Curculionoidea	Attelabidae	Rhynchitinae	Byctiscus	Byctiscus populi	JN163965
Curculionoidea	Attelabidae	Rhynchitinae	Cyllorhynchites	Cyllorhynchites ursulus	MH156809
Curculionoidea	Attelabidae	Rhynchitinae	Deporaus	Deporaus betulae	JN163945
Curculionoidea	Attelabidae	Rhynchitinae	Deporaus	Deporaus tristis	KX087280
Curculionoidea	Brachyceridae	Brachycerinae	Brachycerus	Brachycerus muricatus	JN163970
Curculionoidea	Brentidae	-	-	Brentidae sp. GENSP01	JX412805
Curculionoidea	Brentidae	Apioninae	Apion	Apion squamigerum	MN459662
Curculionoidea	Brentidae	Apioninae	Rhopalapion	Rhopalapion longirostre	JN163967
Curculionoidea	Brentidae	Nanophyinae	Nanophyes	Nanophyes marmoratus	JN163946
Curculionoidea	Brentidae	Nanophyinae	Nanophyes	Nanophyes sp. CG271	MH473534
Curculionoidea	Curculionidae	-	-	Curculionidae sp. 1 AH-2016	KX087270
Curculionoidea	Curculionidae	-	-	Curculionidae sp. BMNH 1039956	KX035169
Curculionoidea	Curculionidae	-	-	Curculionidae sp. MT-2014 isolate CL78	KM244695
Curculionoidea	Curculionidae	Alcidinae	Alcidodes	Alcidodes juglans	MH819192
Curculionoidea	Curculionidae	Baridinae	Melanobaris	Melanobaris laticollis	JN163955
Curculionoidea	Curculionidae	Ceutorhynchinae	Ceutorhynchus	Ceutorhynchus obstrictus	JN163956
Curculionoidea	Curculionidae	Ceutorhynchinae	Ceutorhynchus	Ceutorhynchus parvulus	KX087257
Curculionoidea	Curculionidae	Cioninae	Cionus	Cionus olens	JN163958
Curculionoidea	Curculionidae	Cleoninae	Larinus	Larinus turbinatus	JN163952
Curculionoidea	Curculionidae	Cossoninae	Brachytemnus	Brachytemnus porcatus	JN163960
Curculionoidea	Curculionidae	Cryptorhynchinae	Arachnobas	Arachnobas tricolor	KX087241
Curculionoidea	Curculionidae	Cryptorhynchinae	-	Cryptorhynchinae sp. 7 ACP-2013	MH789716
Curculionoidea	Curculionidae	Cryptorhynchinae	Eucryptorrhynchus	Eucryptorrhynchus brandti	KM593905
Curculionoidea	Curculionidae	Cryptorhynchinae	Eucryptorrhynchus	Eucryptorrhynchus chinensis	KP410324
Curculionoidea	Curculionidae	Cryptorhynchinae	Eucryptorrhynchus	Eucryptorrhynchus scrobiculatus	MG728094
Curculionoidea	Curculionidae	Cryptorhynchinae	Kyklioacalles	Kyklioacalles aubei	JN163957
Curculionoidea	Curculionidae	Cryptorhynchinae	Setarhynchus	Setarhynchus sp. AH-2016	KX087346
Curculionoidea	Curculionidae	Cryptorhynchinae	Trigonopterus	Trigonopterus sp. 1 AH-2016	KX087359
Curculionoidea	Curculionidae	Cryptorhynchinae	Trigonopterus	Trigonopterus sp. 2 AH-2016	KX087360
Curculionoidea	Curculionidae	Curculioninae	Anthonomini	Anthonomus grandis	MG253256
Curculionoidea	Curculionidae	Curculioninae	Anthonomini	Anthonomus pomorum	JN163951
Curculionoidea	Curculionidae	Curculioninae	Anthonomini	Bradybatus kellneri	KX087247
Curculionoidea	Curculionidae	Curculioninae	Ceratopodini	Ceratopus sp.	MH473535
Curculionoidea	Curculionidae	Curculioninae	Curculionini	Curculio davidi	KY057374
Curculionoidea	Curculionidae	Curculioninae	Curculionini	Curculio elephas	KX087269
Curculionoidea	Curculionidae	Curculioninae	Curculionini	Curculio sp. SZ-2019	MG728095
Curculionoidea	Curculionidae	Curculioninae	Mecinini	Mecinus janthinus	KX087312
Curculionoidea	Curculionidae	Cyclominae	Aegorhinus	Aegorhinus superciliosus	KF785807
Curculionoidea	Curculionidae	Cyclominae	Dichotrachelus	Dichotrachelus manueli	MH473536
Curculionoidea	Curculionidae	Dryophthorinae	Cyrtotrachelus	Cyrtotrachelus buqueti	NC_039705
Curculionoidea	Curculionidae	Dryophthorinae	Rhynchophorus	Rhynchophorus ferrugineus	KT428893
Curculionoidea	Curculionidae	Dryophthorinae	Sitophilus	Sitophilus oryzae	KX373615
Curculionoidea	Curculionidae	Dryophthorinae	Sitophilus	Sitophilus zeamais	NC_030764
Curculionoidea	Curculionidae	Dryophthorinae	Sphenophorus	Sphenophorus sp. BYUCO246	GU176342
Curculionoidea	Curculionidae	Entiminae	Geonemini	Barynotus obscurus	JN163950
Curculionoidea	Curculionidae	Entiminae	-	Entiminae sp. ACP-2013 voucher BMNH 1040857	MH789734
Curculionoidea	Curculionidae	Entiminae	Laparocerini	Laparocerus freyi	MH473532
Curculionoidea	Curculionidae	Entiminae	Naupactini	Litostylus pudens	MH473530
Curculionoidea	Curculionidae	Entiminae	Cyphicerini	Myllocerinus aurolineatus	MH197100
Curculionoidea	Curculionidae	Entiminae	Naupactini	Naupactus xanthographus	GU176345
Curculionoidea	Curculionidae	Entiminae	Otiorhynchini	Otiorhynchus rugosostriatus laricis	JN163969
Curculionoidea	Curculionidae	Entiminae	Polydrusini	Pachyrhinus yasumatsui	MF807224
Curculionoidea	Curculionidae	Entiminae	Polydrusini	Polydrusus marginatus	JN039360
Curculionoidea	Curculionidae	Entiminae	Trachyphloeini	Romualdius bifoveolatus	KX087356
Curculionoidea	Curculionidae	Entiminae	Otiorhynchini	Sciobius sp. SCI01	JX412782
Curculionoidea	Curculionidae	Entiminae	Sitonini	Sitona callosus	MF594624
Curculionoidea	Curculionidae	Entiminae	Sitonini	Sitona lineatus	JN163948
Curculionoidea	Curculionidae	Entiminae	Sitonini	Sitona obsoletus	MH814932
Curculionoidea	Curculionidae	Entiminae	Brachyderini	Strophosoma melanogrammum	JN163949
Curculionoidea	Curculionidae	Entiminae	Tanymecini	Sympiezomias velatus	MF383367
Curculionoidea	Curculionidae	Entiminae	Tropiphorini	Tropiphorus elevatus	KX087368
Curculionoidea	Curculionidae	Hyperinae	Hypera	Hypera postica	JN163953
Curculionoidea	Curculionidae	Molytinae	Hylobiini	Hylobitelus xiaoi	JX847496
Curculionoidea	Curculionidae	Molytinae	Hylobiini	Hylobius abietis	JN163954
Curculionoidea	Curculionidae	Molytinae	Lepyrus	Lepyrus sp. G312	MH473533
Curculionoidea	Curculionidae	Molytinae	Cleogonini	Pantoxystus rubricollis	KX087330
Curculionoidea	Curculionidae	Platypodinae	Euplatypus	Euplatypus sp. BMNH 1040069	KX035180
Curculionoidea	Curculionidae	Platypodinae	-	Platypodinae sp. BMNH 1274715	KT696255
Curculionoidea	Curculionidae	Platypodinae	Platypus	Platypus cylindrus	JN163963
Curculionoidea	Curculionidae	Polydrosinae	Liophloeus	Liophloeus tessulatus	JN163947
Curculionoidea	Curculionidae	Scolytinae	Anisandrus	Anisandrus dispar	KX035217
Curculionoidea	Curculionidae	Scolytinae	Corthylus	Corthylus rubricollis	MH473537
Curculionoidea	Curculionidae	Scolytinae	Cyclorhipidion	Cyclorhipidion bodoanus	KX035219
Curculionoidea	Curculionidae	Scolytinae	Dryocoetes	Dryocoetes autographus	KX035207
Curculionoidea	Curculionidae	Scolytinae	Dryocoetes	Dryocoetes villosus	KX035207
Curculionoidea	Curculionidae	Scolytinae	Gnathotrichus	Gnathotrichus materiarius	KX035218
Curculionoidea	Curculionidae	Scolytinae	Hylastes	Hylastes ater	KX035206
Curculionoidea	Curculionidae	Scolytinae	Hylastes	Hylastes attenuatus	KX035212
Curculionoidea	Curculionidae	Scolytinae	Hylastes	Hylastes brunneus	KX035208
Curculionoidea	Curculionidae	Scolytinae	Hylastes	Hylastes opacus	KX035200
Curculionoidea	Curculionidae	Scolytinae	Hylurgops	Hylurgops palliatus	KX035201
Curculionoidea	Curculionidae	Scolytinae	Hypothenemus	Hypothenemus sp. BMNH 1039866	KX035165
Curculionoidea	Curculionidae	Scolytinae	Ips	Ips grandicollis	KY952780
Curculionoidea	Curculionidae	Scolytinae	Ips	Ips sexdentatus	KX035215
Curculionoidea	Curculionidae	Scolytinae	Ips	Ips typographus	KY952782
Curculionoidea	Curculionidae	Scolytinae	Phloeotribus	Phloeophthorus sp.	KX035210
Curculionoidea	Curculionidae	Scolytinae	Pityogenes	Pityogenes bidentatus	KX035211
Curculionoidea	Curculionidae	Scolytinae	Pityogenes	Pityogenes trepanatus	KX035225
Curculionoidea	Curculionidae	Scolytinae	Pityophthorus	Pityophthorus pubescens	KX035209
Curculionoidea	Curculionidae	Scolytinae	-	Scolytinae sp. BMNH 1039855	KX035164
Curculionoidea	Curculionidae	Scolytinae	-	Scolytinae sp. BMNH 1040118	KX035183
Curculionoidea	Curculionidae	Scolytinae	-	Scolytinae sp. BMNH 1274277	KT696202
Curculionoidea	Curculionidae	Scolytinae	Scolytus	Scolytus sp. APV-2011	JN163962
Curculionoidea	Curculionidae	Scolytinae	Tomicus	Tomicus piniperda	KX035226
Curculionoidea	Curculionidae	Scolytinae	Trypodendron	Trypodendron domesticum	KX035205
Curculionoidea	Curculionidae	Scolytinae	Trypodendron	Trypodendron signatum	KX035214
Curculionoidea	Curculionidae	Scolytinae	Trypophloeus	Trypophloeus asperatus	KX035204
Curculionoidea	Curculionidae	Scolytinae	Xyleborinus	Xyleborinus saxesenii	KX035203
Curculionoidea	Curculionidae	Scolytinae	Xyleborus	Xyleborus perforans	JX412850
Curculionoidea	Curculionidae	Scolytinae	Xyleborus	Xyleborus sp. BMNH 1040067	KX035179
Curculionoidea	Curculionidae	Scolytinae	Xylosandrus	Xylosandrus crassiusculus	KX035196
Curculionoidea	Curculionidae	Scolytinae	Xylosandrus	Xylosandrus germanus	KX035202
Curculionoidea	Curculionidae	Scolytinae	Xylosandrus	Xylosandrus morigerus	KX035191
Curculionoidea	Nemonychidae	-	Doydirhynchus	Doydirhynchus austriacus	JN163964
Chrysomeloidea	Cerambycidae	Prioninae	Aegosomatini	Aegosoma sinicum	NC_038089
Chrysomeloidea	Cerambycidae	Lepturinae	Lepturini	Anastrangalia sequensi	NC_038090
Chrysomeloidea	Cerambycidae	Lamiinae	Saperdini	Glenea cantor	NC_043883
Chrysomeloidea	Chrysomelidae	Galerucinae	Atysites	Diorhabda carinulata	NC_042946
Chrysomeloidea	Chrysomelidae	Chrysomelinae	Chrysomelini	Gonioctena intermedia	NC_042500
Note: Bold indicates the species newly sequenced in this study.
