# Supplementary material for: The mitochondrial genome of Apion squamigerum (Coleoptera, Curculionoidea, Brentidae) and the phylogenetic implications
Source: PeerJ. 2020 Jan 13;8:e8386. doi: 10.7717/peerj.8386 (PMC6964704; doi:10.7717/peerj.8386)
Supplement: Table S2 [file peerj-08-8386-s002.xlsx]

## Sheet: Sheet1
Table S2-A. The best partitioning scheme selected by PartitionFinder for the dataset of PCGRNA and the corresponding models selected by both PartitionFinder and ModelFinder.
Subset	Subset Partitions	Best Model
		PartitionFinder	ModelFinder
1	atp6, nad3	GTR+I+G	GTR+F+I+G
2	atp8	GTR+G	TIM3+F+G
3	cob	GTR+I+G	GTR+F+I+G
4	cox1	GTR+I+G	GTR+F+I+G
5	cox3, cox2	GTR+I+G	GTR+F+I+G
6	nad1	GTR+I+G	GTR+F+I+G
7	nad6, nad2	GTR+I+G	GTR+F+I+G
8	nad4	GTR+I+G	GTR+F+I+G
9	nad4l	GTR+I+G	GTR+F+I+G
10	nad5	GTR+I+G	GTR+F+I+G
11	rrnL	GTR+I+G	GTR+F+I+G
12	rrnS	GTR+I+G	GTR+F+I+G
13	tRNA	GTR+I+G	GTR+F+I+G
Note: We used the models selected by ModelFider in the phylogenetic analyses.
Table S2-B. The best partitioning scheme selected by PartitionFinder for the dataset of PCG and the corresponding models selected by both PartitionFinder and ModelFinder.
Subset	Subset Partitions	Best Model
		PartitionFinder	ModelFinder
1	atp6	GTR+I+G	GTR+F+I+G
2	atp8	GTR+G	TIM3+F+G
3	cob	GTR+I+G	GTR+F+I+G
4	cox1	GTR+I+G	GTR+F+I+G
5	cox3, cox2	GTR+I+G	GTR+F+I+G
6	nad1	GTR+I+G	GTR+F+I+G
7	nad2, nad6, nad3	GTR+I+G	GTR+F+I+G
8	nad4	GTR+I+G	GTR+F+I+G
9	nad4l	GTR+I+G	GTR+F+I+G
10	nad5	GTR+I+G	GTR+F+I+G
Note: We used the models selected by ModelFider in the phylogenetic analyses.
Table S2-C. The best partitioning scheme selected by PartitionFinder for the dataset of PCG_AA and the corresponding models selected by both PartitionFinder and ModelFinder.
Subset	Subset Partitions	Best Model
		PartitionFinder	ModelFinder
1	nad2, nad3, atp8, nad6, cox1, cob, atp6, cox2, cox3	MTZOA+I+G+F	MTZOA+F+I+G
2	nad5, nad4l, nad4, nad1	MTZOA+I+G+F	MTZOA+F+I+G
Note: We used the models selected by ModelFider in the phylogenetic analyses.
