# Supplementary material for: The mitochondrial genome of Apion squamigerum (Coleoptera, Curculionoidea, Brentidae) and the phylogenetic implications
Source: PeerJ. 2020 Jan 13;8:e8386. doi: 10.7717/peerj.8386 (PMC6964704; doi:10.7717/peerj.8386)
Supplement: Table S3 [file peerj-08-8386-s003.xlsx]

## Sheet: Sheet1
Table S3. The relative synonymous codon usages of protein-coding genes examined by MEGA 7.
AA	Codon	Count	RSCU	AA	Codon	Count	RSCU	AA	Codon	Count	RSCU
Ala (A)	GCA	43	1.59	His (H)	CAC	18	0.44	Ser (S1)	AGA	45	2.67
	GCC	20	0.74		CAU	64	1.56		AGG	21	1.25
	GCG	5	0.19	Ile (I)	AUC	58	0.3	Ser (S2)	UCA	75	2.2
	GCU	40	1.48		AUU	277	1.43		UCC	24	0.7
Arg (R)	CGA	22	1.31	Leu (L1)	CUA	84	0.98		UCG	4	0.12
	CGC	3	0.18		CUC	21	0.25		UCU	62	1.81
	CGG	3	0.18		CUG	14	0.16	Thr (T)	ACA	83	1.74
	CGU	7	0.42		CUU	75	0.88		ACC	32	0.67
Asn (N)	AAC	76	0.47	Leu (L2)	UUA	286	3.34		ACG	5	0.1
	AAU	247	1.53		UUG	34	0.4		ACU	71	1.49
Asp (D)	GAC	11	0.36	Lys (K)	AAA	239	1.66	Trp (W)	UGA	65	1
	GAU	50	1.64		AAG	49	0.34		UGG	19	1
Cys (C)	UGC	14	0.78	Met (M)	AUA	245	1.27	Tyr (Y)	UAC	55	0.69
	UGU	22	1.22		AUG	27	1		UAU	104	1.31
Gln (Q)	CAA	67	1.61	Phe (F)	UUC	67	0.46	Val (V)	GUA	58	2.17
	CAG	16	0.39		UUU	227	1.54		GUC	11	0.41
Glu (E)	GAA	76	1.79	Pro (P)	CCA	47	1.42		GUG	6	0.22
	GAG	9	0.21		CCC	27	0.82		GUU	32	1.2
Gly (G)	GGA	68	2.5		CCG	8	0.24	*	UAA	108	1.66
	GGC	8	0.29		CCU	50	1.52	*	UAG	22	0.34
	GGG	16	0.59	Ser (S1)	AGC	19	0.56		-	-	-
	GGU	17	0.62		AGU	21	0.61		-	-	-
